# Supplementary material for: Living with the Late Effects of Childhood Cancer Treatment: A Descriptive Qualitative Study
Source: MDPI journal article supplement (doi:10.3390/ijerph18168392), 2021-08-08
Supplement: s1 [file s1]

Supplementary Table S1. Individual in-depth interview guide

| Searching point                                   | Key questions                                                                                                                                                                                                                                                                                           |
|---------------------------------------------------|---------------------------------------------------------------------------------------------------------------------------------------------------------------------------------------------------------------------------------------------------------------------------------------------------------|
| Introduction                                      | <ul style="list-style-type: none"> <li>- Welcome and introduction of researchers</li> <li>- Explaining the interview process and confidentiality</li> </ul>                                                                                                                                             |
| Experience with late effect                       | <ul style="list-style-type: none"> <li>- When and how did the late effect appear?</li> <li>- Do you have any particularly memorable experiences with the late effect?</li> </ul>                                                                                                                        |
| Experience with symptom management of late effect | <ul style="list-style-type: none"> <li>- What did you do to manage the symptoms of late effect and how did it/they affect you?</li> <li>- What helped or hindered you in managing your late effect symptoms?</li> <li>- Do you have any memorable experiences related to symptom management?</li> </ul> |
| Additional questions                              | <ul style="list-style-type: none"> <li>- What does living with the late effect mean to you?</li> <li>- Is there anything else you would like to add?</li> </ul>                                                                                                                                         |
| Summary and closing                               | <ul style="list-style-type: none"> <li>- Summarize the interview</li> </ul>                                                                                                                                                                                                                             |
